# Supplementary material for: Racial and Ethnic Disparities in Regulatory Air Quality Monitor Locations in the US
Source: PubMed Central journal article supplement (PMC11618472; doi:10.1001/jamanetworkopen.2024.49005), 2024-12-04
Supplement: jamanetwopen-e2449005-s002.pdf [file jamanetwopen-e2449005-s002.pdf]

## Data Sharing Statement

Kelly. ZXC Racial and Ethnic Disparities in Regulatory Air Quality Monitor Locations in the US. *JAMA Netw Open*. Published December 04, 2024. doi:10.1001/jamanetworkopen.2024.49005

### Data

**Data available:** Yes

**Data types:** Data (not involving human participants)

**How to access data:** Data will be hosted in a GitHub repository: [github.com/brenna-c-kelly/aqs\\_racial\\_inequity](https://github.com/brenna-c-kelly/aqs_racial_inequity)

**When available:** With publication

### Supporting Documents

**Document types:** Statistical/analytic code

**How to access documents:** The R code for this analysis is freely available in a GitHub repository: [github.com/brenna-c-kelly/aqs\\_racial\\_inequity](https://github.com/brenna-c-kelly/aqs_racial_inequity)

**When available:** With publication

### Additional Information

**Who can access the data:** Anyone requesting the data

**Types of analyses:** For any purpose

**Mechanisms of data availability:** Without investigator support
